# Supplementary material for: Impacts on tundra vegetation from heavy metal-enriched fugitive dust on National Park Service lands along the Red Dog Mine haul road, Alaska
Source: PLOS journal article supplement (doi:10.1371/journal.pone.0269801), 2022-06-13
Supplement: S8 (10.1371/journal.pone.0269801.s008) [file journal.pone.0269801.s008]

**S2 File. Modeled LSR in current study vs. modeled Zn from Neitlich et al. [17] on a log-log scale.**

**Table 1. Mean modeled Zn values and standard deviation from Neitlich et al. (2017) at three spatial points of high LSR along the DMTS haul road in CAKR.** Ten spatial modeling grid points bracketing the target LSR value were selected for three estimates of modeled Zn concentration. Selected LSR targets were: 1) the mean LSR of the highest stratum (3000-4000m), 2) the  $\geq 95\%$  of the mean LSR of the highest stratum used in mapping, and 3) the 3000 m distance representing the beginning of the stratum with highest LSR in stratum-based analysis.

| LSR Targets                          | n  | LSR  | Mean Zn | SD Zn |
|--------------------------------------|----|------|---------|-------|
| Mean LSR of highest stratum (MHS)    | 10 | 41.9 | 62.2    | 15.5  |
| $\geq 95\%$ MHS                      | 10 | 39.8 | 58.3    | 17.1  |
| 3000 m (+/- 25 m) distance from DMTS | 10 | 39.2 | 69.7    | 21.2  |

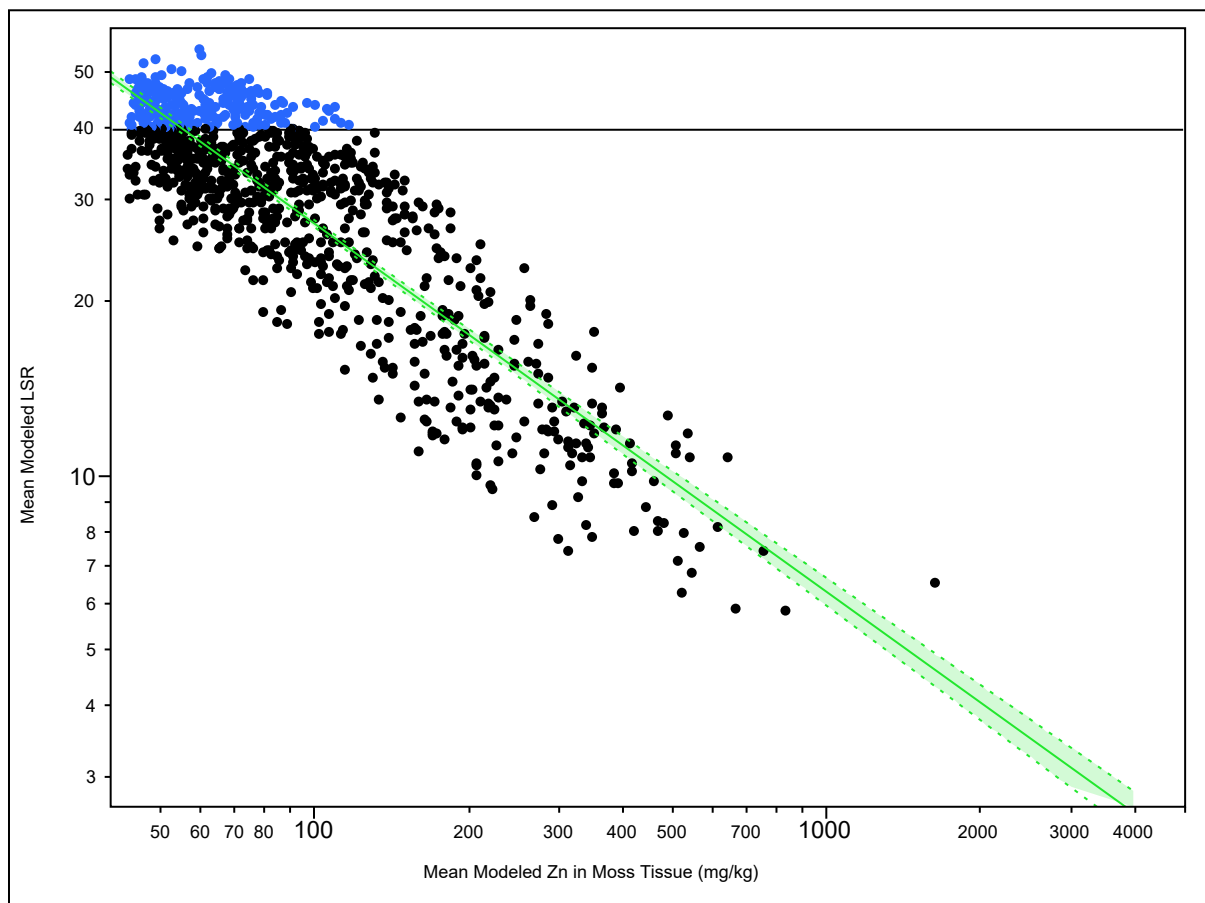

**Fig 1. Mean modeled LSR vs. mean modeled Zn in Hylocomium tissue from Neitlich et al. [17] 2017.** Points along the DMTS haul road in CAKR were plotted on a log<sub>10</sub>-log<sub>10</sub> scale. Modeling was based on data collected at the same field points and using the same posterior

prediction grid. Dots at  $LSR \geq 39.8$  (or 95% of the MHS) are shown in blue. In linear regression,  $r^2=0.76$ ,  $p<0.001$ .
